# Supplementary material for: Placenta Accreta Spectrum Disorder Complicated with Endometriosis: Systematic Review and Meta-Analysis
Source: MDPI journal article supplement (doi:10.3390/biomedicines10020390), 2022-02-06
Supplement: s1 [file s1]

## Supplemental File S1. The search strategy.

### PubMed

- #1 "In Vitro Fertilization" [TIAB]
- #2 fertilization in vitro [MeSH]
- #3 Assisted Reproductive Techniques [MeSH]
- #4 Embryo Transfer [MeSH]
- #5 Intracytoplasmic Sperm Injection [MeSH]
- #6 Cryopreserved [TIAB]
- #7 "Oocyte donation" [TIAB]
- #8 "fresh cycle" [TIAB]
- #9 "frozen cycle" [TIAB]
- #10 #1 OR #2 OR #3 OR #4 OR #5 OR #6 OR #7 OR #8 OR #9
- #11 Endometriosis [MeSH]
- #12 endometriosis [TIAB] OR endometrioma [TIAB] OR "chocolate cyst" [TIAB]
- #13 adhesion [TIAB] OR "ectopic endometri\*" [TIAB]
- #14 peritoneal [TIAB] OR abdominal [TIAB] OR pelvic [TIAB] OR Douglas [TIAB] OR "uterine wall" [TIAB] OR "anterior wall" [TIAB] OR "posterior wall" [TIAB] OR abdominal [TIAB] OR ovary [TIAB] OR extrauterine [TIAB] OR extraovarian [TIAB] OR cul-de-sac [TIAB] OR adnexal [TIAB] 635,500
- #15 #13 AND #14
- #16 #11 OR #12 OR #15
- #17 Placenta previa [MeSH]
- #18 "placenta previa" [TIAB] OR "low lying placenta" [TIAB]
- #19 "abnormal placenta\*" [TIAB]
- #20 Placenta accreta [MeSH]
- #21 "Morbidly adherent placenta" [TIAB] OR "Morbid adherent placenta" [TIAB]
- #22 "Placenta accreta spectrum " [TIAB]
- #23 "Placenta accreta" [TIAB] OR "Placenta increta" [TIAB] OR "placenta percreta" [TIAB]
- #24 "adherence of the placenta" [TIAB] OR "adherent placenta" [TIAB]
- #25 #17 OR #18 OR #19 OR #20 OR #21 OR #22 OR #23 OR #24
- #26 #16 AND #25

### Cochrane Library

- #1 "In Vitro Fertilization":ab,ti,kw
- #2 MeSH descriptor: [fertilization in vitro] explode all trees
- #3 MeSH descriptor: [Assisted Reproductive Techniques] explode all trees
- #4 MeSH descriptor: [Embryo Transfer] explode all trees
- #5 MeSH descriptor: [Intracytoplasmic Sperm Injection] explode all trees

#6 Cryopreserved:ab,ti,kw  
 #7 "Oocyte donation":ab,ti,kw  
 #8 "fresh cycle":ab,ti,kw  
 #9 "frozen cycle":ab,ti,kw  
 #10 #1 OR #2 OR #3 OR #4 OR #5 OR #6 OR #7 OR #8 OR #9  
 #11 MeSH descriptor: [Endometriosis] explode all trees  
 #12 endometriosis:ab,ti,kw OR "endometrioma:ab,ti,kw OR "chocolate cyst":ab,ti,kw  
 #13 #11 OR #12  
 #14 adhesion:ab,ti,kw OR ectopic endometrium:ab,ti,kw  
 #15 peritoneal:ab,ti,kw OR abdominal:ab,ti,kw OR pelvic:ab,ti,kw OR Douglas:ab,ti,kw OR "uterine wall":ab,ti,kw OR "anterior wall":ab,ti,kw OR "posterior wall":ab,ti,kw OR abdominal:ab,ti,kw OR ovary:ab,ti,kw OR extrauterine:ab,ti,kw OR extraovarian:ab,ti,kw OR cul-de-sac:ab,ti,kw OR adnexal:ab,ti,kw  
 #16 #14 AND #15  
 #17 #13 OR #16  
 #18 MeSH descriptor: [Placenta previa] explode all trees  
 #19 "Placenta previa":ab,ti,kw OR "low lying placenta":ab,ti,kw  
 #20 "abnormal placenta":ab,ti,kw  
 #21 MeSH descriptor: [Placenta accreta] explode all trees  
 #22 "Morbidly adherent placenta":ab,ti,kw OR "Morbid adherent placenta":ab,ti,kw  
 #23 "Placenta accreta spectrum":ab,ti,kw  
 #24 "Placenta accreta":ab,ti,kw OR "Placenta increta":ab,ti,kw OR "Placenta percreta":ab,ti,kw  
 #25 "adherence of placenta":ab,ti,kw OR "adherence of the placenta":ab,ti,kw OR "adherent placenta":ab,ti,kw  
 #26 #18 OR #19 OR #20 OR #21 OR #22 OR #23 OR #24 OR #25  
 #27 #17 AND #26

## Scopus

#1 TITLE-ABS-KEY ("In Vitro Fertilization")  
 #2 TITLE-ABS-KEY ("fertilization in vitro")  
 #3 TITLE-ABS-KEY ("Assisted Reproductive Techniques" OR "Assisted Reproductive Technology")  
 #4 TITLE-ABS-KEY ("Embryo Transfer")  
 #5 TITLE-ABS-KEY ("Intracytoplasmic Sperm Injection")  
 #6 TITLE-ABS-KEY ("Cryopreserved")  
 #7 TITLE-ABS-KEY ("oocyte donation")  
 #8 TITLE-ABS-KEY ("fresh cycle")  
 #9 TITLE-ABS-KEY ("frozen cycle")

#10 #1 OR #2 OR #3 OR #4 OR #5 OR #6 OR #7 OR #8 OR #9

#11 TITLE-ABS-KEY ("endometriosis" OR "endometrioma" OR "chocolate cyst")

#12 TITLE-ABS-KEY ("adhesion" OR "ectopic endometrium")

#13 TITLE-ABS-KEY (peritoneal OR abdominal OR pelvic OR Douglas OR "uterine wall" OR "anterior wall" OR "posterior wall" OR abdominal OR ovary OR extrauterine OR extraovarian OR cul-de-sac OR adnexal)

#14 #12 AND #13

#15 #11 OR #14

#16 TITLE-ABS-KEY ("placenta previa" OR "low lying placenta")

#17 TITLE-ABS-KEY ("abnormal placentation")

#18 TITLE-ABS-KEY ("Morbidly adherent placenta" OR "Morbid adherent placenta")

#19 TITLE-ABS-KEY ("Placenta Accreta Spectrum")

#20 TITLE-ABS-KEY ("Placenta accreta" OR "Placenta increta" OR "Placenta percreta")

#21 TITLE-ABS-KEY ("adherence of placenta" OR "adherence of the placenta" OR "adherent placenta")

#22 #16 OR #17 OR #18 OR #19 OR #20 OR #21

#23 #15 AND #22

Supplemental Table S1. Meta data of included studies.

| Author                      | Location | Year | Period                                | Type       | Match | Exp               | Control                   | Total                | Total No. End      | Exp No. End   | Control No. End | No. Exp       | No. Control       | End PAS | ART PP | ART PAS |
|-----------------------------|----------|------|---------------------------------------|------------|-------|-------------------|---------------------------|----------------------|--------------------|---------------|-----------------|---------------|-------------------|---------|--------|---------|
| Wang Y <sup>1</sup>         | CHN      | 2021 | 2013-2018                             | Nationwide | --    | ART               | No ART                    | 16879728             | --                 | --            | --              | 269738        | 16609990          | --      | Yes    | Yes     |
| Zargar M <sup>2</sup>       | IRN      | 2021 | --                                    | Retro      | --    | Frozen            | Fresh                     | 669                  | --                 | --            | --              | 356           | 313               | --      | Yes    | --      |
| Hu KL <sup>3</sup>          | CHN      | 2021 | 2013-2019                             | Retro      | --    | HRC               | NC                        | 7021                 | --                 | --            | --              | 2561          | 3790              | --      | Yes    | --      |
| Asserhøj LL <sup>4</sup>    | DNK      | 2021 | 2006-2014                             | Retro      | --    | HRC               | NC                        | 1136                 | 33                 | 16            | 17              | 357           | 779               | --      | Yes    | --      |
| Wang J <sup>5</sup>         | CHN      | 2021 | 2009-2018                             | Retro      | Yes   | ART_end           | No ART                    | 8773                 | 74                 | 74            | --              | 1241          | 6832 <sup>d</sup> | Yes     | Yes    | Yes     |
| Epelboin S <sup>6</sup>     | FRN      | 2021 | 2013-2018                             | Nationwide | --    | ART_end<br>SC_end | ART_non-end<br>SC_non-end | 4121767              | 38035              | 6934<br>31101 | 31101<br>0      | 6934<br>31101 | 31101<br>4083732  | --      | Yes    | --      |
| Cochrane E <sup>7</sup>     | CHN      | 2020 | 2015-2018                             | Retro      | Yes   | ART               | SC                        | 360                  | --                 | --            | --              | 120           | 240 <sup>d</sup>  | --      | Yes    | Yes     |
| Modest AM <sup>8</sup>      | USA      | 2020 | 2013-2018                             | Retro      | --    | ART               | No ART                    | 28344                | --                 | --            | --              | 1418          | 26926             | --      | --     | Yes     |
| Salmanian B <sup>9</sup>    | USA      | 2020 | 2012-2019                             | Retro      | --    | ART               | No ART                    | 37461                | --                 | --            | --              | 571           | 36890             | --      | Yes    | Yes     |
| Shinohara S <sup>10</sup>   | JPN      | 2020 | 2012-2017                             | Retro      | --    | ART               | SC                        | 2583                 | --                 | --            | --              | 442           | 1764              | --      | Yes    | --      |
| Farella M <sup>11</sup>     | ITA      | 2020 | 2009-2016                             | Retro      | --    | Frozen            | Fresh                     | 535                  | --                 | --            | --              | 330           | 112               | --      | Yes    | --      |
| Petersen SH <sup>12</sup>   | ITA      | 2020 | 2009-2016                             | Retro      | --    | ART_end           | SC_end                    | 535                  | 535                | 199           | 336             | 199           | 336               | --      | Yes    | --      |
| Petersen SH <sup>12</sup>   | NOR      | 2020 | 1994-2015                             | Nationwide | --    | ART               | SC                        | 6830578              | --                 | --            | --              | 146998        | 6683580           | --      | Yes    | --      |
| Spangmose AL <sup>13</sup>  | NOR      | 2020 | 1997-2015<br>Overlapped <sup>12</sup> | Nationwide | --    | ART <sup>†</sup>  | SC                        | 2864880              | --                 | 244           | Unk             | 4601          | 2808323           | --      | Yes    | --      |
| Tanaka H <sup>14</sup>      | JPN      | 2020 | 2015-2017                             | Retro      | --    | ART               | No ART                    | 6952                 | --                 | --            | --              | 811           | 6141              | --      | Yes    | Yes     |
| Kyozuka H <sup>15</sup>     | JPN      | 2019 | 2011-2014                             | Nationwide | --    | ART               | No ART                    | 90554                | --                 | --            | --              | 2658          | 87896             | --      | --     | Yes     |
| Miura M <sup>16</sup>       | JPN      | 2019 | 2010-2017                             | Retro      | --    | ART               | No ART                    | 2769                 | 80                 | 23            | 57              | 366           | 2403              | --      | Yes    | --      |
| Santi E <sup>17</sup>       | ITA      | 2019 | 2014-2018                             | Retro      | --    | ART               | No ART                    | 11769                | --                 | --            | --              | 281           | 11488             | --      | Yes    | --      |
| Sakai Y <sup>18</sup>       | JPN      | 2019 | 2015-2017                             | Retro      | --    | Frozen            | Fresh <sup>c</sup>        | 87                   | --                 | --            | --              | 60            | 27                | --      | Yes    | Yes     |
| Saito K <sup>19</sup>       | JPN      | 2019 | 2014                                  | Nationwide | --    | HRC               | NC                        | 34980                | --                 | --            | --              | 24225         | 10755             | --      | Yes    | Yes     |
| Szymusik <sup>120</sup>     | POL      | 2019 | 2004-2014                             | Retro      | Yes   | ART               | SC                        | 634                  | --                 | 33            | Unk             | 336           | 308 <sup>d</sup>  | --      | Yes    | --      |
| Yang P <sup>21</sup>        | CHN      | 2019 | 2015-2018                             | Retro      | Yes   | ART               | No ART                    | 4989                 | --                 | --            | --              | 1663          | 3326 <sup>d</sup> | --      | Yes    | --      |
| Nagata C <sup>22</sup>      | JPN      | 2019 | 2011-2014<br>overlapped <sup>15</sup> | Nationwide | --    | ART               | SC                        | 97592                | --                 | --            | --              | 3147          | 90506             | --      | Yes    | #       |
| Rahu K <sup>23</sup>        | EST      | 2019 | 2005-2014                             | Nationwide | --    | ART               | SC                        | 35333                | --                 | --            | --              | 1778          | 33555             | --      | Yes    | --      |
| Shmueli A <sup>24</sup>     | ISR      | 2019 | 2007-2014                             | Retro      | --    | End               | Non-end                   | 61535                | 135                | 135           | 61400           | 135           | 61400             | Yes     | --     | --      |
| Nirgianakis K <sup>25</sup> | CHE      | 2018 | 2004-2015                             | Retro      | Yes   | End               | Non-end                   | 248                  | 62                 | 62            | 186             | 62            | 186 <sup>d</sup>  | Yes     | --     | --      |
| Sabban H <sup>26</sup>      | CAN      | 2017 | 2008-2011                             | Nationwide | --    | ART               | No ART                    | 3315764              | --                 | --            | --              | 5773          | 3309991           | --      | Yes    | --      |
| Li H <sup>27</sup>          | CHN      | 2017 | 2011-2013                             | Retro      | Yes   | ART_end           | No ART_end                | 375                  | 75                 | 24            | 74              | 24            | 74 <sup>d</sup>   | --      | Yes    | --      |
| Berlac JF <sup>28</sup>     | DNK      | 2017 | 1977-2014                             | Nationwide | --    | End               | Non-end                   | 1091251 <sup>b</sup> | 19331 <sup>b</sup> | 19331         | 0               | 19331         | 1071920           | Yes     | --     | --      |
| Qin J <sup>29</sup>         | CHN      | 2017 | 2013-2016                             | Retro      | --    | ART               | SC                        | 7023                 | --                 | --            | --              | 1260          | 2480              | --      | Yes    | --      |
| Fujii T <sup>30</sup>       | JPN      | 2016 | 2000-2014                             | Retro      | --    | ART_end           | ART_non-end               | 604                  | 92                 | 92            | 0               | 92            | 512               | --      | Yes    | --      |
| Zhu L <sup>31</sup>         | CHN      | 2016 | 2006-2014                             | Retro      | Yes   | ART               | SC                        | 7923                 | --                 | --            | --              | 2641          | 5282 <sup>d</sup> | --      | Yes    | Yes     |
| Benaglia L <sup>32</sup>    | ITA      | 2016 | 2008-2014                             | Retro      | Yes   | ART_end           | ART_non-end               | 478                  | --                 | --            | --              | 239           | 239 <sup>d</sup>  | --      | Yes    | --      |
| Wennberg AL <sup>33</sup>   | DNK      | 2016 | 1982-2007<br>Overlapped <sup>12</sup> | Nationwide | --    | ART               | SC                        | 273536               | --                 | --            | --              | 35571         | 237965            | --      | Yes    | --      |
| Jacques M <sup>34</sup>     | FRN      | 2016 | 2009-2014                             | Retro      | Yes   | ART_end           | ART_non-end               | 2315                 | 113                | 113           | 0               | 113           | 113 <sup>d</sup>  | --      | Yes    | --      |
| Ginström E <sup>35</sup>    | SWE      | 2016 | 2002-2013                             | Nationwide | --    | ART               | SC                        | 1226960              | --                 | --            | --              | 30566         | 1196394           | --      | Yes    | --      |
| Valenzuela B <sup>36</sup>  | ESP      | 2016 | 2004-2010                             | Retro      | --    | Frozen            | Fresh                     | 30566                | --                 | --            | --              | 7795          | 22771             | --      | Yes    | --      |
| Takeshima K <sup>37</sup>   | JPN      | 2016 | 2007-2012                             | Nationwide | --    | ART               | No ART                    | 948                  | --                 | --            | --              | 223           | 725               | --      | Yes    | --      |
| Kaser DJ <sup>38</sup>      | USA      | 2015 | 2005-2011                             | Retro      | Yes   | Frozen            | Fresh                     | 141,228              | --                 | --            | --              | 90783         | 50445             | --      | Yes    | Yes     |
| Rombauts L <sup>39</sup>    | AUS      | 2014 | 2006-2012                             | Retro      | --    | Frozen            | Fresh                     | 199                  | --                 | --            | --              | 42            | 157               | --      | --     | Yes     |
| Korosec S <sup>40</sup>     | SVN      | 2014 | 2004-2011                             | Retro      | --    | Frozen            | Fresh                     | 4537                 | 316                | 99            | 217             | 1586          | 2951              | --      | Yes    | --      |
| Yang X <sup>41</sup>        | CHN      | 2014 | 2011                                  | Retro      | --    | Frozen            | Fresh                     | 1126                 | 229                | 42            | 187             | 211           | 915               | --      | Yes    | Yes     |
| Yang X <sup>41</sup>        | CHN      | 2014 | 2011                                  | Retro      | --    | ART               | SC                        | 112403               | --                 | --            | --              | 1139          | 111264            | --      | Yes    | --      |
| Ishihara O <sup>42</sup>    | JPN      | 2014 | 2008-2010                             | Nationwide | --    | ART               | SC                        | 112403               | --                 | --            | --              | 1139          | 111264            | --      | Yes    | --      |
| Ishihara O <sup>42</sup>    | JPN      | 2014 | 2008-2010                             | Nationwide | --    | Frozen            | Fresh                     | 48158                | --                 | --            | --              | 31249         | 16909             | --      | Yes    | Yes     |

|                            |     |      |                                       |            |     |                     |                    |        |    |      |    |      |        |    |     |     |
|----------------------------|-----|------|---------------------------------------|------------|-----|---------------------|--------------------|--------|----|------|----|------|--------|----|-----|-----|
|                            |     |      | overlapped <sup>37</sup>              |            |     |                     |                    |        |    |      |    |      |        |    |     |     |
| Räsänen S <sup>43</sup>    | FIN | 2013 | 2006-2010                             | Nationwide | --  | ART                 | No ART             | 291004 | -- | --   | -- | 5647 | 285357 | -- | Yes | --  |
| Liu SY <sup>44</sup>       | CHN | 2013 | 2006-2011                             | Retro      | --  | Frozen <sup>a</sup> | Fresh <sup>a</sup> | 16492  | -- | --   | -- | 1531 | 1914   | -- | Yes | --  |
| Takemura Y <sup>45</sup>   | JPN | 2013 | --                                    | Retro      | --  | ART_end             | ART_non-end        | 318    | 53 | 53   | 0  | 53   | 265    | -- | Yes | --  |
| Sazonova A <sup>46</sup>   | SWE | 2012 | 2002-2006<br>Overlapped <sup>35</sup> | Nationwide | --  | Frozen              | Fresh              | 11292  | -- | --   | -- | 2348 | 8944   | -- | Yes | --  |
| Hayashi M <sup>47</sup>    | JPN | 2012 | 2001-2005                             | Nationwide | Yes | ART                 | SC                 | 25069  | -- | --   | -- | 4570 | 4264   | -- | Yes | Yes |
| Benaglia L <sup>48</sup>   | ESP | 2012 | 2005-2009                             | Retro      | Yes | ART_end             | ART_non-end        | 234    | 78 | 78   | 0  | 78   | 156    | -- | Yes | --  |
| Esh-Broder E <sup>49</sup> | ISR | 2011 | 2004-2009                             | Retro      | --  | ART                 | SC                 | 25193  | -- | --   | -- | 752  | 24441  | -- | --  | Yes |
|                            |     |      |                                       |            |     | ART                 | No ART             |        |    |      |    | 6730 | 24619  |    |     |     |
| Healy DL <sup>50</sup>     | AUS | 2010 | 1991-2004                             | Nationwide | --  | Frozen              | Fresh              | 34295  | -- | --   | -- | 2503 | 4227   | -- | Yes | --  |
|                            |     |      |                                       |            |     | ART_end             | ART_non-end        |        |    | 1265 | 0  | 1265 | 5465   |    |     |     |
| Verlaenen H <sup>51</sup>  | BEL | 1995 | 1988-1994                             | Retro      | Yes | ART                 | No ART             | 280    | -- | --   | -- | 140  | 140    | -- | Yes | --  |
| Hill GA <sup>52</sup>      | USA | 1990 | 1982-1988                             | Retro      | Yes | ART                 | No ART             | 182    | -- | --   | -- | 61   | 121    | -- | Yes | --  |

† blastocyst transfer; # the data about PAS was not used due to the overlapping data<sup>22</sup>; <sup>a</sup>: day 3 embryo <sup>b</sup>: No. of infants <sup>c</sup>: ovulation cycle <sup>d</sup>: patient background matched control cases. Some values listed above might be slightly different from the original values, as estimated by the authors. Abbreviations: Exp, Experimental; End, endometriosis; PAS, placenta accreta spectrum; PP, placenta previa; ART, assisted reproductive technology; Period, study period; Retro, retrospective study; Nationwide, nationwide study; Type, type of study; --, not applicable; Frozen, frozen embryo transfer; Fresh, fresh embryo transfer; Match, patient background matched study; No., number; END PAS, the study examined the effect of endometriosis on the prevalence of PAS; ART PP, the study determined the effect of ART on the prevalence of placenta previa; ART PAS, the study investigated the influence of ART on the prevalence of placenta accreta spectrum; ART\_end; women with endometriosis conceived by ART; ART\_non-end; women without endometriosis conceived by ART; SC\_end; Spontaneous conception with endometriosis; SC\_non-end; Spontaneous conception without endometriosis; HRC, hormone replacement cycle; NC, natural cycle; Unk, unknown; AUS, Australia; BEL, Belgium; CHE, Switzerland; CHN, China; DNK, Denmark; ESP, Spain; EST, Estonia; FIN, Finland; FRN, France; GBR, United Kingdom; IRN, Iran; ISR, Israel; ITA, Italia; JPN, Japan; NOR, Norway; POL, Poland; SVN, Slovenia; SWE, Sweden; USA, United States of America.

**Supplemental Table S2. Metadata of studies (the rate of placenta previa: ART versus No ART and SC).**

|                            | Year | Exp     | Control    | ART<br>End     | No ART<br>End | End<br>ART         | Non-End<br>ART   | Exp<br>Previa | Control<br>Previa | Adjusted OR<br>(95%CI)        | Exp<br>End | Control<br>End | Exp<br>Previa | Control<br>Previa | No.<br>Exp | No.<br>Control |
|----------------------------|------|---------|------------|----------------|---------------|--------------------|------------------|---------------|-------------------|-------------------------------|------------|----------------|---------------|-------------------|------------|----------------|
| Wang Y <sup>1</sup>        | 2021 | ART     | No ART     | --             | --            | --                 | --               | 12376 (4.6%)  | 325504 (2%)       | --                            | --         | --             | 12376         | 325504            | 269738     | 16609990       |
| Wang J <sup>5</sup>        | 2021 | ART     | No ART     | 74/1241 (6.0%) |               | 74 (100%)          |                  | 47 (3.8%)     | 94 (1.4%)         | 9.33 (4.22-20.62)             | 74         | --             | 47            | 94                | 1241       | 6832           |
| Epelboin S <sup>6,a</sup>  | 2021 | ART_end | SC_end     | 100%           | 100%          | 6934/38035 (18.2%) | --               | 330 (4.8%)    | 520 (1.7%)        | 2.43 (2.10-2.82)              | 38035      | --             | 330           | 520               | 6934       | 31101          |
| Cochrane E <sup>7</sup>    | 2020 | ART     | SC         | --             | --            | --                 | --               | 5 (4.2%)      | 1 (0.4%)          | --                            | --         | --             | 5             | 1                 | 120        | 240            |
| Salmanian B <sup>9</sup>   | 2020 | ART     | No ART     | --             | --            | --                 | --               | 10 (1.8%)     | 271 (0.7%)        | --                            | --         | --             | 10            | 271               | 571        | 36890          |
| Shinohara S <sup>10</sup>  | 2020 | ART     | SC         | --             | --            | --                 | --               | 3 (0.7%)      | 18 (1%)           | --                            | --         | --             | 3             | 18                | 442        | 1764           |
| Farella M <sup>11,a</sup>  | 2020 | ART_end | SC_end     | 100%           | 100%          | 199/535 (37.2%)    | --               | 7 (3.5%)      | 2 (0.6%)          | --                            | 535        | 0              | 7             | 2                 | 199        | 336            |
| Petersen SH <sup>12</sup>  | 2020 | ART     | SC         | --             | --            | --                 | --               | 2560(1.7%)    | 22410 (0.3%)      | 3.87 (3.70-4.04)              | --         | --             | 2560          | 22410             | 146998     | 6683580        |
| Tanaka H <sup>14</sup>     | 2020 | ART     | No ART     | --             | --            | --                 | --               | 34 (4.2%)     | 96 (1.6%)         | 1.96 (1.24–3.06)              | --         | --             | 34            | 96                | 811        | 6141           |
| Miura M <sup>16</sup>      | 2019 | ART     | No ART     | --             | --            | 23/80 (28.8%)      | 343/2689 (12.8%) | --            | --                | 2.71 (1.70–4.31)              | 23         | 57             | --            | --                | 366        | 2403           |
| Santi E <sup>17</sup>      | 2019 | ART     | No ART     | --             | --            | --                 | --               | 9 (3.2%)      | 68 (0.6%)         | --                            | --         | --             | 9             | 68                | 281        | 11488          |
| Szymusik I <sup>20</sup>   | 2019 | ART     | SC         | 33/336 (9.1%)  | --            | --                 | --               | 11 (3.3%)     | 2 (0.6%)          | --                            | 33         | --             | 11            | 2                 | 336        | 308            |
| Yang P <sup>21</sup>       | 2019 | ART     | No ART     | --             | --            | --                 | --               | 191 (11.5%)   | 254 (7.6%)        | --                            | --         | --             | 191           | 254               | 1663       | 3326           |
| Nagata C <sup>22</sup>     | 2019 | ART     | SC         | --             | --            | --                 | --               | 66 (2.1%)     | 489 (0.5%)        | 2.44 (1.87–3.20) <sup>b</sup> | --         | --             | 66            | 489               | 3147       | 90506          |
| Rahu K <sup>23</sup>       | 2019 | ART     | SC         | --             | --            | --                 | --               | 22 (1.2%)     | 51 (0.2%)         | --                            | --         | --             | 22            | 51                | 1778       | 33555          |
| Sabban H <sup>26</sup>     | 2017 | ART     | No ART     | --             | --            | --                 | --               | 200 (3.5%)    | 18801 (0.6%)      | 3.14(2.71-3.64)               | --         | --             | 200           | 18801             | 5773       | 3309991        |
| Li H <sup>27</sup>         | 2017 | ART_end | No ART_end | 100%           | 100%          | 24/98 (24.5%)      | --               | 2 (8.3%)      | 0 (0%)            | --                            | 24         | 74             | 2             | 0                 | 24         | 74             |
| Qin J <sup>29</sup>        | 2017 | ART     | No ART     | --             | --            | --                 | --               | --            | --                | 4.11 (2.12-7.96)              | --         | --             | --            | --                | 1260       | 2480           |
| Zhu L <sup>31</sup>        | 2016 | ART     | SC         | --             | --            | --                 | --               | 185 (7%)      | 179 (3.4%)        | 2.23 (1.79–2.78)              | --         | --             | 185           | 179               | 2641       | 5282           |
| Ginström E <sup>35</sup>   | 2016 | ART     | SC         | --             | --            | --                 | --               | 531 (1.7%)    | 3443 (0.3%)       | 6.38 (5.31-7.66) <sup>a</sup> | --         | --             | 531           | 3443              | 30566      | 1196394        |
| Valenzuela B <sup>36</sup> | 2016 | ART     | No ART     | --             | --            | --                 | --               | 3 (1.3%)      | 5 (0.7%)          | --                            | --         | --             | 3             | 5                 | 223        | 725            |
| Yang X <sup>41</sup>       | 2014 | ART     | SC         | --             | --            | --                 | --               | 48 (4.2%)     | 1087 (1%)         | 2.18 (1.62–2.94)              | --         | --             | 48            | 1087              | 1139       | 111264         |
| Räisänen S <sup>43</sup>   | 2013 | ART     | No ART     | --             | --            | --                 | --               | 91 (1.6%)     | 571 (0.2%)        | --                            | --         | --             | 91            | 571               | 5647       | 285357         |
| Hayashi M <sup>47</sup>    | 2012 | ART     | SC         | --             | --            | --                 | --               | --            | --                | 2.2 (1.68-2.87)               | --         | --             | --            | --                | 4570       | 4264           |
| Healy DL <sup>50</sup>     | 2010 | ART     | No ART     | --             | --            | --                 | --               | 174 (2.6%)    | 273 (1.1%)        | 2.34 (1.87–2.92)              | --         | --             | 174           | 273               | 6730       | 24619          |
| Verlaenen H <sup>51</sup>  | 1995 | ART     | No ART     | --             | --            | --                 | --               | 4 (2.9%)      | 0 (0%)            | --                            | --         | --             | 4             | 0                 | 140        | 140            |
| Hill GA <sup>52</sup>      | 1990 | ART     | No ART     | --             | --            | --                 | --               | 4 (6.6%)      | 2 (1.7%)          | --                            | --         | --             | 4             | 2                 | 61         | 121            |

<sup>a</sup> limited the cases with blastocyst transfer; <sup>b</sup> calculated by the authors. Some values listed above might be slightly different from the original values, as estimated by the authors. Abbreviations: Exp, Experimental; End, endometriosis; Previa, placenta previa; ART, assisted reproductive technology; --, not applicable; No., number; Exp Previa (%), the rate of placenta previa in the experimental group; Control Previa (%), the rate of placenta previa in the control group; Exp Previa; the number of women with placenta previa in the experimental group; Control Previa; the number of women with placenta previa in the control group; No. Exp, the number of included pregnant women in the experimental group; No. Control, the number of included pregnant women in the control group; ART End (%); the rate of endometriosis in women who conceived using ART; End ART, the rate of ART pregnancy in women with endometriosis; ART\_end; women with endometriosis conceived by ART; SC\_end; Spontaneous conception with endometriosis; OR, odds ratio, CI, confidence interval.

**Supplemental Table S3. Metadata of studies (the effect of ART on the rate of placenta previa: sensitivity analysis).**

| Author                                                  | Year | Exp                 | Control            | Exp<br>End (%)    | Control<br>End (%) | End<br>ART (%) | Non-End<br>ART (%) | Exp<br>Previa (%) | Control<br>Previa (%) | Exp No.<br>End | Control<br>No. End | No.<br>Exp        | No.<br>Control    | Adjusted OR<br>(95%CI)        |
|---------------------------------------------------------|------|---------------------|--------------------|-------------------|--------------------|----------------|--------------------|-------------------|-----------------------|----------------|--------------------|-------------------|-------------------|-------------------------------|
| Endometriosis versus Non-endometriosis (women with ART) |      |                     |                    |                   |                    |                |                    |                   |                       |                |                    |                   |                   |                               |
| Wang J <sup>5</sup>                                     | 2021 | ART_end             | ART_non-end        | 74/1167 (6.0%)    | --                 | 100%           | 100%               | 8 (10.8%)         | 39 (3.3%)             | 74             | 1167               | 74                | 1167              | --                            |
| Fujii T <sup>30</sup>                                   | 2016 | ART_end             | ART_non-end        | 92/604 (15.2%)    | --                 | 100%           | 100%               | 8 (8.7%)          | 4 (0.8%)              | 92             | 512                | 92                | 512               | 15.41 (4.40-61.7)             |
| Benaglia L <sup>32</sup>                                | 2016 | ART_end             | ART_non-end        | --                | --                 | 100%           | 100%               | 14 (5.9%)         | 3 (1.3%)              | 239            | 239                | 239               | 239               | --                            |
| Jacques M <sup>34</sup>                                 | 2016 | ART_end             | ART_non-end        | 160/2315 (6.9%)   | --                 | 100%           | 100%               | 3 (2.7%)          | 3 (2.7%)              | 113            | 113                | 113               | 113               | --                            |
| Takemura Y <sup>45</sup>                                | 2013 | ART_end             | ART_non-end        | 53/318 (16.7%)    | --                 | 100%           | 100%               | 9 (17%)           | 4 (1.5%)              | 53             | 265                | 53                | 265               | --                            |
| Benaglia L <sup>48</sup>                                | 2012 | ART_end             | ART_non-end        | --                | --                 | 100%           | 100%               | 3 (3.8%)          | 1 (0.6%)              | 78             | 156                | 78                | 156               | --                            |
| Healy DL <sup>50</sup>                                  | 2010 | ART_end             | ART_non-end        | 1265/6730 (18.8%) | --                 | 100%           | 100%               | 48 (3.8%)         | 126 (2.3%)            | --             | --                 | 1265              | 5465              | 1.65 (1.18–2.32)              |
| ART versus SC (women with endometriosis)                |      |                     |                    |                   |                    |                |                    |                   |                       |                |                    |                   |                   |                               |
| Epelboin S <sup>6</sup>                                 | 2021 | ART_end             | SC_end             | 6934/38035(18.2%) | --                 | 100%           | 0%                 | 330 (4.8%)        | 520 (1.7%)            | 6934           | 31101              | 6934              | 31101             | --                            |
|                                                         |      | ART_end             | SC_non-end         | --                | --                 | 100%           | 0%                 | 330 (4.8%)        | 23002 (0.6%)          | 6934           | 0                  | 6934              | 4083732           | --                            |
| Frozen ET versus Fresh ET                               |      |                     |                    |                   |                    |                |                    |                   |                       |                |                    |                   |                   |                               |
| Zargar M <sup>2</sup>                                   | 2021 | Frozen              | Fresh              | --                | --                 | --             | --                 | 17 (4.8%)         | 16 (5.1%)             | --             | --                 | 356               | 313               | --                            |
| Shinohara S <sup>10</sup>                               | 2020 | Frozen              | Fresh              | --                | --                 | --             | --                 | 2 (0.6%)          | 1 (0.9%)              | --             | --                 | 330               | 112               | --                            |
| Sakai Y <sup>18</sup>                                   | 2019 | Frozen              | Fresh <sup>b</sup> | --                | --                 | --             | --                 | 9 (15%)           | 3 (11.1%)             | --             | --                 | 60                | 27 <sup>b</sup>   | --                            |
| Ginström E <sup>35</sup>                                | 2016 | Frozen              | Fresh              | --                | --                 | --             | --                 | 80 (1%)           | 451 (2%)              | --             | --                 | 7795              | 22771             | --                            |
| Takeshima K <sup>37</sup>                               | 2016 | Frozen              | Fresh              | --                | --                 | --             | --                 | 656 (0.7%)        | 460 (0.9%)            | --             | --                 | 90783             | 50445             | --                            |
| Kaser DJ <sup>38</sup>                                  | 2015 | Frozen              | Fresh              | --                | --                 | --             | --                 | 7 (16.6%)         | 31 (19.8%)            | --             | --                 | 42                | 157               | --                            |
| Rombauts L <sup>39</sup>                                | 2014 | Frozen              | Fresh              | 99/1586 (6.2%)    | 217 (7.4%)         | --             | --                 | 33 (2.1%)         | 112 (3.8%)            | 99             | 217                | 1586              | 2951              | --                            |
| Korosec S <sup>40</sup>                                 | 2014 | Frozen              | Fresh              | 43/211 (20.4%)    | 187 (20.4%)        | --             | --                 | 0 (0%)            | 32 (3.5%)             | 43             | 187                | 211               | 915               | --                            |
| Liu SY <sup>44</sup>                                    | 2013 | Frozen <sup>a</sup> | Fresh <sup>a</sup> | --                | --                 | --             | --                 | 7 (0.5%)          | 6 (0.3%)              | --             | --                 | 1531 <sup>a</sup> | 1914 <sup>a</sup> | --                            |
| Healy DL <sup>50</sup>                                  | 2010 | Frozen              | Fresh              | --                | --                 | --             | --                 | 51 (2.5%)         | 123 (3.0%)            | --             | --                 | 2045              | 4058              | 0.73 (0.51–1.04) <sup>c</sup> |
| HRC versus NC (Frozen ET)                               |      |                     |                    |                   |                    |                |                    |                   |                       |                |                    |                   |                   |                               |
| Hu KL <sup>3</sup>                                      | 2021 | HRC                 | NC                 | 122 (4.8%)        | 198 (5.2%)         | --             | --                 | 14 (0.5%)         | 15 (0.4%)             | 122            | 198                | 2561              | 3790              | 0.58 (0.27–1.24) <sup>c</sup> |
| Asserhøj LL <sup>4</sup>                                | 2021 | HRC                 | NC                 | 16 (5.0%)         | 15 (2.9%)          | --             | --                 | 7 (2/0%)          | 15 (1.9%)             | 16             | 15                 | 357               | 731               | 1.10 (0.46–2.62)              |
| Saito K <sup>19</sup>                                   | 2019 | HRC                 | NC                 | --                | --                 | --             | --                 | 119 (0.5%)        | 66 (0.6%)             | --             | --                 | 24225             | 10755             | 1.00 (0.64–1.56)              |
| Rombauts L <sup>39</sup>                                | 2014 | HRC                 | NC                 | --                | --                 | --             | --                 | 12 (3.4%)         | 21 (1.7%)             | --             | --                 | 355               | 1231              | --                            |

<sup>a</sup> day 3 embryo; <sup>b</sup> two cases were FET; <sup>c</sup> calculated by the author. Some values listed above might be slightly different from the original values, as estimated by the authors. Abbreviations: Exp, Experimental; End, endometriosis; Exp End, the rate of endometriosis in the experimental group; Control End, the rate of endometriosis in the control group; Exp No. End, the number of women with endometriosis in the experimental group; Control No. End, the number of women with endometriosis in the control group; No. Exp, the number of included pregnant women in the experimental group; No. Control, the number of included pregnant women in the control group; Previa, placenta previa; ART, assisted reproductive technology; --, not applicable; ET, embryo transfer; No., number; OR, odds rate; CI, confidence interval; END PAS, the study examined the effect of endometriosis on the prevalence of PAS; ART PP, the study determined the effect of ART on the prevalence of placenta previa; ART PAS, the study investigated the influence of ART on the prevalence of placenta accreta spectrum; ART\_end; women with endometriosis conceived by ART; ART\_non-end; women without endometriosis conceived by ART; SC\_end; Spontaneous conception with endometriosis; SC\_non-end; Spontaneous conception without endometriosis; HRC, hormone replacement cycle; NC, natural cycle.

**Supplemental Table S4. Metadata of studies (the effect of ART on the rate of placenta accreta spectrum disorder).**

| Author                           | Year | Exp    | Control | Total    | Exp End | Control End | Exp PASD               | Control PASD           | No. Exp | No. Control     | Adjusted OR (95%CI)           |
|----------------------------------|------|--------|---------|----------|---------|-------------|------------------------|------------------------|---------|-----------------|-------------------------------|
| <b>ART versus No ART and SC</b>  |      |        |         |          |         |             |                        |                        |         |                 |                               |
| Wang Y <sup>1</sup>              | 2021 | ART    | No ART  | 16879728 | --      | --          | 12655 (4.7%)           | 325816 (2.0%)          | 269738  | 16609990        | --                            |
| Wang J <sup>5</sup>              | 2021 | ART    | No ART  | 8773     | 74      | --          | 44 (3.5%)              | 148 (2.2%)             | 1241    | 6832            | 1.67 (1.16-2.41) <sup>a</sup> |
| Cochrane E <sup>7</sup>          | 2020 | ART    | SC      | 360      | --      | --          | 3 (2.5%)               | 0 (0%)                 | 120     | 240             | --                            |
| Modest AM <sup>8</sup>           | 2020 | ART    | No ART  | 28344    | --      | --          | 31 (2.2%)              | 81 (0.3%)              | 1418    | 26926           | --                            |
| Salmanian B <sup>9</sup>         | 2020 | ART    | No ART  | 37461    | --      | --          | 12 (2.1%)              | 218 (0.6%)             | 571     | 36890           | --                            |
| Tanaka H <sup>14</sup>           | 2020 | ART    | No ART  | 6952     | --      | --          | 18 (2.2%)              | 18 (0.3%)              | 811     | 6141            | 7.35 (3.20-16.6)              |
| Kyozuka H <sup>15</sup>          | 2019 | ART    | No ART  | 90554    | --      | --          | 39 (1.5%)              | 163 (0.2%)             | 2658    | 87896           | 6.78 (4.54-10.14)             |
| Zhu L <sup>31</sup>              | 2016 | ART    | SC      | 7923     | --      | --          | 197 (7.5%)             | 173 (3.3%)             | 2641    | 5282            | 2.37 (1.90-2.95)              |
| Hayashi M <sup>47</sup>          | 2012 | ART    | SC      | 25069    | --      | --          | 37 (0.8%) <sup>a</sup> | 13 (0.3%) <sup>a</sup> | 4570    | 4264            | --                            |
| Esh-Broder E <sup>49</sup>       | 2011 | ART    | SC      | 25193    | --      | --          | 12 (1.6%)              | 30 (0.1%)              | 752     | 24441           | --                            |
| <b>Frozen ET versus Fresh ET</b> |      |        |         |          |         |             |                        |                        |         |                 |                               |
| Sakai Y <sup>18</sup>            | 2019 | Frozen | Fresh   | 87       | --      | --          | 19 (31.7%)             | 2 (7.4%)               | 60      | 27 <sup>b</sup> | --                            |
| Takeshima K <sup>37</sup>        | 2016 | Frozen | Fresh   | 141,228  | --      | --          | 321 (0.4%)             | 35 (0.1%)              | 90783   | 50445           | --                            |
| Kaser DJ <sup>38</sup>           | 2015 | Frozen | Fresh   | 199      | --      | --          | 16 (38.1%)             | 34 (21.7%)             | 42      | 157             | 3.20 (1.14-9.02)              |
| Korosec S <sup>40</sup>          | 2014 | Frozen | Fresh   | 1126     | 43      | 187         | 7 (3.3%)               | 29 (3.2%)              | 211     | 915             | --                            |
| <b>HRC versus NC (Frozen ET)</b> |      |        |         |          |         |             |                        |                        |         |                 |                               |
| Saito K <sup>19</sup>            | 2019 | HRC    | NC      | 34980    | --      | --          | 142 (0.6%)             | 11 (0.1%)              | 24225   | 10755           | 6.91 (2.87-16.66)             |

<sup>a</sup> calculated by the author <sup>b</sup> two cases were frozen. Some values listed above might be slightly different from the original values, as estimated by the authors. Abbreviations: Exp, Experimental; End, endometriosis; Exp End, number of women with endometriosis in experimental group; Control End, number of women with endometriosis in control group; Exp End, the rate of endometriosis in the experimental group; Control End, the rate of endometriosis in the control group; Exp PASD, the number of women with placenta accreta spectrum disorder in the experimental group; Control PASD, the number of women with placenta accreta spectrum disorder in the control group; No. Exp, the number of included pregnant women in the experimental group; No. Control, the number of included pregnant women in the control group; PASD, placenta accreta spectrum disorder; ART, assisted reproductive technology; SC, spontaneous conception; --, not applicable; ET, embryo transfer; No., number; HRC, hormone replacement cycle; NC, natural cycle; OR, odds ratio; CI, confidence interval.



Supplemental Table S5. Risk of bias assessment for the comparator study.

| Authors                     | Confounding | Selection | Classification of intervention | Deviations from interventions | Missing data | Measurement of outcomes | Reported results | Overall bias |
|-----------------------------|-------------|-----------|--------------------------------|-------------------------------|--------------|-------------------------|------------------|--------------|
| Wang Y <sup>1</sup>         |             |           |                                |                               |              |                         |                  |              |
| Zargar M <sup>2</sup>       |             |           |                                |                               |              |                         |                  |              |
| Hu KL <sup>3</sup>          |             |           |                                |                               |              |                         |                  |              |
| Asserhøj LL <sup>4</sup>    |             |           |                                |                               |              |                         |                  |              |
| Wang J <sup>5</sup>         |             |           |                                |                               |              |                         |                  |              |
| Epelboin S <sup>6</sup>     |             |           |                                |                               |              |                         |                  |              |
| Cochrane E <sup>7</sup>     |             |           |                                |                               |              |                         |                  |              |
| Modest AM <sup>8</sup>      |             |           |                                |                               |              |                         |                  |              |
| Salmanian B <sup>9</sup>    |             |           |                                |                               |              |                         |                  |              |
| Shinohara S <sup>10</sup>   |             |           |                                |                               |              |                         |                  |              |
| Farella M <sup>11</sup>     |             |           |                                |                               |              |                         |                  |              |
| Petersen SH <sup>12</sup>   |             |           |                                |                               |              |                         |                  |              |
| Tanaka H <sup>14</sup>      |             |           |                                |                               |              |                         |                  |              |
| Kyozuka H <sup>15</sup>     |             |           |                                |                               |              |                         |                  |              |
| Miura M <sup>16</sup>       |             |           |                                |                               |              |                         |                  |              |
| Santi E <sup>17</sup>       |             |           |                                |                               |              |                         |                  |              |
| Sakai Y <sup>18</sup>       |             |           |                                |                               |              |                         |                  |              |
| Saito K <sup>19</sup>       |             |           |                                |                               |              |                         |                  |              |
| Szymusik I <sup>20</sup>    |             |           |                                |                               |              |                         |                  |              |
| Yang P <sup>21</sup>        |             |           |                                |                               |              |                         |                  |              |
| Nagata C <sup>22</sup>      |             |           |                                |                               |              |                         |                  |              |
| Rahu K <sup>23</sup>        |             |           |                                |                               |              |                         |                  |              |
| Shmueli A <sup>24</sup>     |             |           |                                |                               |              |                         |                  |              |
| Nirgianakis K <sup>25</sup> |             |           |                                |                               |              |                         |                  |              |
| Sabban H <sup>26</sup>      |             |           |                                |                               |              |                         |                  |              |
| Li H <sup>27</sup>          |             |           |                                |                               |              |                         |                  |              |
| Berlac JF <sup>28</sup>     |             |           |                                |                               |              |                         |                  |              |
| Qin J <sup>29</sup>         |             |           |                                |                               |              |                         |                  |              |
| Fujii T <sup>30</sup>       |             |           |                                |                               |              |                         |                  |              |
| Zhu L <sup>31</sup>         |             |           |                                |                               |              |                         |                  |              |
| Benaglia L <sup>32</sup>    |             |           |                                |                               |              |                         |                  |              |
| Jacques M <sup>34</sup>     |             |           |                                |                               |              |                         |                  |              |
| Ginström E <sup>35</sup>    |             |           |                                |                               |              |                         |                  |              |
| Valenzuela B <sup>36</sup>  |             |           |                                |                               |              |                         |                  |              |
| Takeshima K <sup>37</sup>   |             |           |                                |                               |              |                         |                  |              |
| Kaser DJ <sup>38</sup>      |             |           |                                |                               |              |                         |                  |              |
| Rombauts L <sup>39</sup>    |             |           |                                |                               |              |                         |                  |              |
| Korosec S <sup>40</sup>     |             |           |                                |                               |              |                         |                  |              |
| Yang X <sup>41</sup>        |             |           |                                |                               |              |                         |                  |              |
| Räisänen S <sup>43</sup>    |             |           |                                |                               |              |                         |                  |              |
| Liu SY <sup>44</sup>        |             |           |                                |                               |              |                         |                  |              |
| Takemura Y <sup>45</sup>    |             |           |                                |                               |              |                         |                  |              |

|                            |   |   |   |   |   |   |   |   |
|----------------------------|---|---|---|---|---|---|---|---|
| Hayashi M <sup>47</sup>    | ● | ● | ● | ● | ● | ● | ● | ● |
| Benaglia L <sup>48</sup>   | ● | ● | ● | ● | ● | ● | ● | ● |
| Esh-Broder E <sup>49</sup> | ● | ● | ● | ● | ● | ● | ● | ● |
| Healy DL <sup>50</sup>     | ● | ● | ● | ● | ● | ● | ● | ● |
| Verlaenen H <sup>51</sup>  | ● | ● | ● | ● | ● | ● | ● | ● |
| Hill GA <sup>52</sup>      | ● | ● | ● | ● | ● | ● | ● | ● |

Updated and reproduced the data from Sci Rep. 2021;11:920 Matsuzaki S *et al.* Antenatal diagnosis of placenta accreta spectrum after in vitro fertilization-embryo transfer: a systematic review and meta-analysis / Supplemental Table S3. Risk of bias assessment for the comparator study.<sup>53</sup>

Risk of bias assessment was performed using the Risk Of Bias In Non-randomized Studies–of Interventions tool (ROBINS-I).<sup>54-56</sup>

- Low risk of bias (the study is comparable to a well-performed randomized trial with regard to this domain)
- Moderate risk of bias (the study is sound for a non-randomized study with regard to this domain but cannot be considered comparable to a well-performed randomized trial)
- Serious risk of bias (the study has some important problems in this domain)
- Critical risk of bias (the study is too problematic in this domain to provide any useful evidence on the effects of intervention).
- No information on how to base a judgment on the risk of bias for this domain.

## References

1. Wang Y, Shi H, Chen L, et al. Absolute Risk of Adverse Obstetric Outcomes Among Twin Pregnancies After In Vitro Fertilization by Maternal Age. *JAMA network open* 2021;4:e2123634.
2. Zargar M, Dehdashti S, Najafian M, Choghakabodi PM. Pregnancy outcomes following in vitro fertilization using fresh or frozen embryo transfer. *JBRA assisted reproduction* 2021;25:570-74.
3. Hu KL, Zhang D, Li R. Endometrium preparation and perinatal outcomes in women undergoing single-blastocyst transfer in frozen cycles. *Fertil Steril* 2021;115:1487-94.
4. Asserhøj LL, Spangmose AL, Aaris Henningsen AK, et al. Adverse obstetric and perinatal outcomes in 1,136 singleton pregnancies conceived after programmed frozen embryo transfer (FET) compared with natural cycle FET. *Fertil Steril* 2021;115:947-56.
5. Wang J, Liu Q, Deng B, Chen F, Liu X, Cheng J. Pregnancy outcomes of Chinese women undergoing IVF with embryonic cryopreservation as compared to natural conception. *BMC Pregnancy Childbirth* 2021;21:39.
6. Epelboin S, Labrosse J, Fauque P, et al. Endometriosis and assisted reproductive techniques independently related to mother-child morbidities: a French longitudinal national study. *Reprod Biomed Online* 2020.
7. Cochrane E, Pando C, Kirschen GW, Soucier D, Fuchs A, Garry DJ. Assisted reproductive technologies (ART) and placental abnormalities. *Journal of perinatal medicine* 2020;48:825-28.
8. Modest AM, Toth TL, Johnson KM, Shainker SA. Placenta Accreta Spectrum: In Vitro Fertilization and Non-In Vitro Fertilization and Placenta Accreta Spectrum in a Massachusetts Cohort. *Am J Perinatol* 2020.
9. Salmanian B, Fox KA, Arian SE, et al. In vitro fertilization as an independent risk factor for placenta accreta spectrum. *Am J Obstet Gynecol* 2020;223:568.e1-68.e5.
10. Shinohara S, Hirata S, Suzuki K. Association between infertility treatment and intrauterine growth: a multilevel analysis in a retrospective cohort study. *BMJ open* 2020;10:e033675.
11. Farella M, Chanavaz-Lacheray I, Verspick E, et al. Pregnancy outcomes in women with history of surgery for endometriosis. *Fertil Steril* 2020;113:996-1004.
12. Petersen SH, Bergh C, Gissler M, et al. Time trends in placenta-mediated pregnancy complications after assisted reproductive technology in the Nordic countries. *Am J Obstet Gynecol* 2020;223:226.e1-26.e19.
13. Spangmose AL, Ginström Ernstad E, Malchau S, et al. Obstetric and perinatal risks in 4601 singletons and 884 twins conceived after fresh blastocyst transfers: a Nordic study from the CoNARTaS group. *Hum Reprod* 2020;35:805-15.
14. Tanaka H, Tanaka K, Osato K, et al. Evaluation of Maternal and Neonatal Outcomes of Assisted Reproduction Technology: A Retrospective Cohort Study. *Medicina (Kaunas, Lithuania)* 2020;56.
15. Kyoizuka H, Yamaguchi A, Suzuki D, et al. Risk factors for placenta accreta spectrum: findings from the Japan environment and Children's study. *BMC Pregnancy Childbirth* 2019;19:447.
16. Miura M, Ushida T, Imai K, et al. Adverse effects of endometriosis on pregnancy: a case-control study. *BMC Pregnancy Childbirth* 2019;19:373.
17. Santi E, Nencini G, Cerni A, et al. The PLART study: incidence of preterm labor and adverse pregnancy outcomes after assisted reproductive techniques-a retrospective cohort study. *Arch Gynecol Obstet* 2019;300:911-16.
18. Sakai Y, Ono M, Iizuka T, et al. Embryo transfer associated with hormone replacement therapy cycles using assisted reproductive technology increases placenta accreta spectrum. *The journal of obstetrics and gynaecology research* 2019;45:2394-99.
19. Saito K, Kuwahara A, Ishikawa T, et al. Endometrial preparation methods for frozen-thawed embryo transfer are associated with altered risks of hypertensive disorders of pregnancy, placenta accreta, and gestational diabetes mellitus. *Hum Reprod* 2019;34:1567-75.
20. Szymusik I, Kosinska-Kaczynska K, Krowicka M, Sep M, Marianowski P, Wielgos M. Perinatal outcome of in vitro fertilization singletons - 10 years' experience of one center. *Archives of medical science : AMS* 2019;15:666-72.
21. Yang P, Kang H, Ma C, Wei Y, Tao L, Wu Z. Risk of preterm delivery in singletons conceived by in vitro fertilization. *Gynecological endocrinology : the official journal of the International Society of Gynecological Endocrinology* 2019;35:661-64.
22. Nagata C, Yang L, Yamamoto-Hanada K, et al. Complications and adverse outcomes in pregnancy and childbirth among women who conceived by assisted reproductive technologies: a nationwide birth cohort study of Japan environment and children's study. *BMC Pregnancy Childbirth* 2019;19:77.
23. Rahu K, Allvee K, Karro H, Rahu M. Singleton pregnancies after in vitro fertilization in Estonia: a register-based study of complications and adverse outcomes in relation to the maternal socio-demographic background. *BMC Pregnancy Childbirth* 2019;19:51.
24. Shmueli A, Salman L, Hirsch L, et al. Obstetrical and neonatal outcomes of pregnancies complicated by endometriosis. *J Matern Fetal Neonatal Med* 2019;32:845-50.
25. Nirgianakis K, Gasparri ML, Radan AP, et al. Obstetric complications after laparoscopic excision of

- posterior deep infiltrating endometriosis: a case-control study. *Fertil Steril* 2018;110:459-66.
26. Sabban H, Zakhari A, Patenaude V, Tulandi T, Abenhaim HA. Obstetrical and perinatal morbidity and mortality among in-vitro fertilization pregnancies: a population-based study. *Arch Gynecol Obstet* 2017;296:107-13.
27. Li H, Zhu HL, Chang XH, et al. Effects of Previous Laparoscopic Surgical Diagnosis of Endometriosis on Pregnancy Outcomes. *Chinese medical journal* 2017;130:428-33.
28. Berlac JF, Hartwell D, Skovlund CW, Langhoff-Roos J, Lidegaard O. Endometriosis increases the risk of obstetrical and neonatal complications. *Acta Obstet Gynecol Scand* 2017;96:751-60.
29. Qin J, Sheng X, Wu D, et al. Adverse Obstetric Outcomes Associated With In Vitro Fertilization in Singleton Pregnancies. *Reproductive sciences (Thousand Oaks, Calif)* 2017;24:595-608.
30. Fujii T, Wada-Hiraike O, Nagamatsu T, et al. Assisted reproductive technology pregnancy complications are significantly associated with endometriosis severity before conception: a retrospective cohort study. *Reproductive biology and endocrinology : RB&E* 2016;14:73.
31. Zhu L, Zhang Y, Liu Y, et al. Maternal and Live-birth Outcomes of Pregnancies following Assisted Reproductive Technology: A Retrospective Cohort Study. *Scientific reports* 2016;6:35141.
32. Benaglia L, Candotti G, Papaleo E, et al. Pregnancy outcome in women with endometriosis achieving pregnancy with IVF. *Hum Reprod* 2016;31:2730-36.
33. Wennberg AL, Opdahl S, Bergh C, et al. Effect of maternal age on maternal and neonatal outcomes after assisted reproductive technology. *Fertil Steril* 2016;106:1142-49.e14.
34. Jacques M, Freour T, Barriere P, Ploteau S. Adverse pregnancy and neo-natal outcomes after assisted reproductive treatment in patients with pelvic endometriosis: a case-control study. *Reprod Biomed Online* 2016;32:626-34.
35. Ginström Ernstad E, Bergh C, Khatibi A, et al. Neonatal and maternal outcome after blastocyst transfer: a population-based registry study. *Am J Obstet Gynecol* 2016;214:378.e1-78.e10.
36. Valenzuela-Alcaraz B, Crispi F, Manau D, et al. Differential effect of mode of conception and infertility treatment on fetal growth and prematurity. *J Matern Fetal Neonatal Med* 2016;29:3879-84.
37. Takeshima K, Jwa SC, Saito H, et al. Impact of single embryo transfer policy on perinatal outcomes in fresh and frozen cycles-analysis of the Japanese Assisted Reproduction Technology registry between 2007 and 2012. *Fertil Steril* 2016;105:337-46.e3.
38. Kaser DJ, Melamed A, Bormann CL, et al. Cryopreserved embryo transfer is an independent risk factor for placenta accreta. *Fertil Steril* 2015;103:1176-84.e2.
39. Rombauts L, Motteram C, Berkowitz E, Fernando S. Risk of placenta praevia is linked to endometrial thickness in a retrospective cohort study of 4537 singleton assisted reproduction technology births. *Hum Reprod* 2014;29:2787-93.
40. Korosec S, Ban Frangez H, Verdenik I, et al. Singleton pregnancy outcomes after in vitro fertilization with fresh or frozen-thawed embryo transfer and incidence of placenta praevia. *BioMed research international* 2014;2014:431797.
41. Yang X, Li Y, Li C, Zhang W. Current overview of pregnancy complications and live-birth outcome of assisted reproductive technology in mainland China. *Fertil Steril* 2014;101:385-91.
42. Ishihara O, Araki R, Kuwahara A, Itakura A, Saito H, Adamson GD. Impact of frozen-thawed single-blastocyst transfer on maternal and neonatal outcome: an analysis of 277,042 single-embryo transfer cycles from 2008 to 2010 in Japan. *Fertil Steril* 2014;101:128-33.
43. Räisänen S, Randell K, Nielsen HS, et al. Socioeconomic status affects the prevalence, but not the perinatal outcomes, of in vitro fertilization pregnancies. *Hum Reprod* 2013;28:3118-25.
44. Liu SY, Teng B, Fu J, Li X, Zheng Y, Sun XX. Obstetric and neonatal outcomes after transfer of vitrified early cleavage embryos. *Hum Reprod* 2013;28:2093-100.
45. Takemura Y, Osuga Y, Fujimoto A, et al. Increased risk of placenta previa is associated with endometriosis and tubal factor infertility in assisted reproductive technology pregnancy. *Gynecological endocrinology : the official journal of the International Society of Gynecological Endocrinology* 2013;29:113-5.
46. Sazonova A, Kallen K, Thurin-Kjellberg A, Wennerholm UB, Bergh C. Obstetric outcome in singletons after in vitro fertilization with cryopreserved/thawed embryos. *Hum Reprod* 2012;27:1343-50.
47. Hayashi M, Nakai A, Satoh S, Matsuda Y. Adverse obstetric and perinatal outcomes of singleton pregnancies may be related to maternal factors associated with infertility rather than the type of assisted reproductive technology procedure used. *Fertil Steril* 2012;98:922-8.
48. Benaglia L, Bermejo A, Somigliana E, et al. Pregnancy outcome in women with endometriomas achieving pregnancy through IVF. *Hum Reprod* 2012;27:1663-7.
49. Esh-Broder E, Ariel I, Abas-Bashir N, Bdolah Y, Celnikier DH. Placenta accreta is associated with IVF pregnancies: a retrospective chart review. *Bjog* 2011;118:1084-9.
50. Healy DL, Breheny S, Halliday J, et al. Prevalence and risk factors for obstetric haemorrhage in 6730 singleton births after assisted reproductive technology in Victoria Australia. *Hum Reprod* 2010;25:265-74.
51. Verlaenen H, Cammu H, Derde MP, Amy JJ. Singleton pregnancy after in vitro fertilization:

- expectations and outcome. *Obstetrics and gynecology* 1995;86:906-10.
52. Hill GA, Bryan S, Herbert CM, 3rd, Shah DM, Wentz AC. Complications of pregnancy in infertile couples: routine treatment versus assisted reproduction. *Obstetrics and gynecology* 1990;75:790-4.
  53. Matsuzaki S, Nagase Y, Takiuchi T, et al. Antenatal diagnosis of placenta accreta spectrum after in vitro fertilization-embryo transfer: a systematic review and meta-analysis. *Scientific reports* 2021;11:9205.
  54. Sterne JA, Hernan MA, Reeves BC, et al. ROBINS-I: a tool for assessing risk of bias in non-randomised studies of interventions. *BMJ* 2016;355:i4919.
  55. Danna SM, Graham E, Burns RJ, Deschenes SS, Schmitz N. Association between Depressive Symptoms and Cognitive Function in Persons with Diabetes Mellitus: A Systematic Review. *PLoS One* 2016;11:e0160809.
  56. ROBINS-I detailed guidance (2016). <https://www.riskofbias.info/welcome/home/current-version-of-robins-i/robins-i-detailed-guidance-2016>. (accessed 11/20/2021).
