# Supplementary material for: Placenta Accreta Spectrum Disorder Complicated with Endometriosis: Systematic Review and Meta-Analysis
Source: MDPI journal article supplement (doi:10.3390/biomedicines10020390), 2022-02-06
Supplement: s1 [file s1]

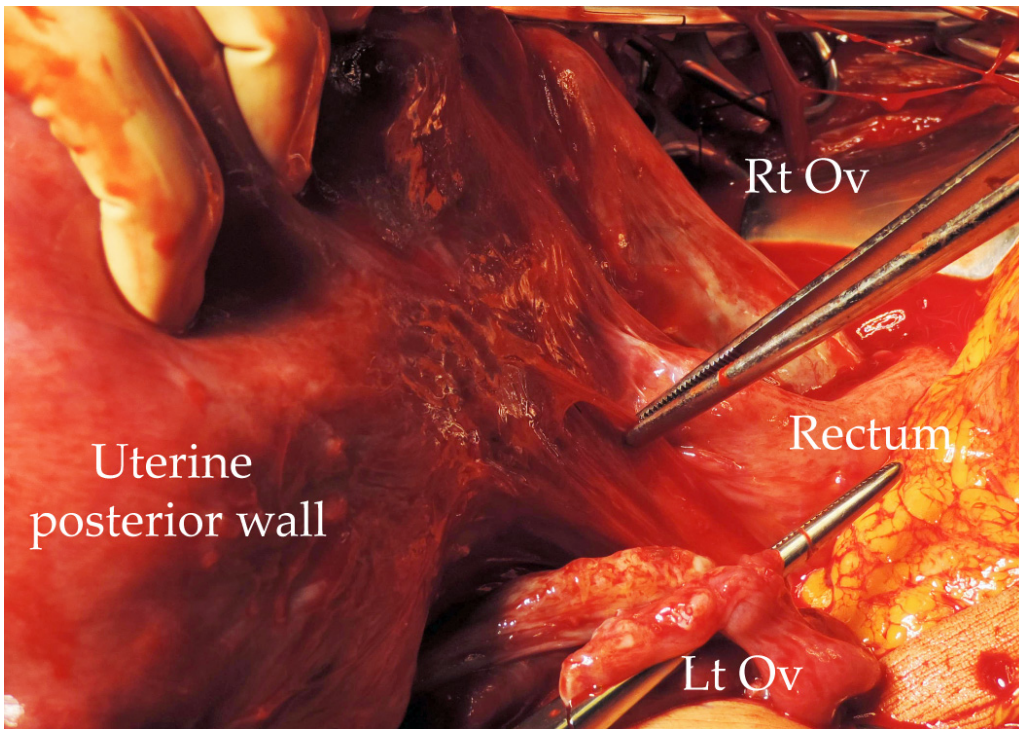

**Supplemental Figure S1. Intraoperative image of placenta accreta spectrum complicated with endometriosis during cesarean hysterectomy.**

A strong adhesion between the uterine posterior wall and rectum is observed. Massive hemorrhage (approximately 4800 mL) caused by the severe adhesion is observed. Abbreviations: Rt, right; Lt, left; Ov, ovary. Modified from Matsuzaki S *et al.* Horizontal cervix as a novel sign for predicting adhesions on the posterior extrauterine wall in cases of placenta previa. J Clin Med. 2019 Dec 4;8:2141.
